# Supplementary material for: Robust dose planning objectives for mesorectal radiotherapy of early stage rectal cancer – A multicentre dose planning study
Source: PubMed Central journal article supplement (PMC7033757; doi:10.1016/j.tipsro.2019.09.001), 2019-10-15
Supplement: mmc1.pdf [file mmc1.pdf]

## Supplementary materials

### Robust dose planning objectives for mesorectal radiotherapy of early stage rectal cancer – a multicentre dose planning study

#### Appendix A: Selected studies of dose-volume effect for bowel toxicity

| Reference              | Endpoint                           | Type                                             | Patient # | Patient population                 | Treatment technique | OAR definition                                | Main findings                                                                                                                                                                                                                                                                  |
|------------------------|------------------------------------|--------------------------------------------------|-----------|------------------------------------|---------------------|-----------------------------------------------|--------------------------------------------------------------------------------------------------------------------------------------------------------------------------------------------------------------------------------------------------------------------------------|
| Baglan et al (1)       | Acute bowel toxicity               | Retrospective                                    | 40        | Rectal cancer, LCRT                | 3D-CRT              | Bowel loops                                   | Correlation with volume at each dose level at 5-40 Gy. Suggestion of “threshold effect” at ~15-25 Gy. Suggested volume-response for $V_{15Gy}$ .                                                                                                                               |
| Tho et al (2)          | Acute bowel toxicity               | Retrospective                                    | 41        | Rectal cancer, LCRT                | 3D-CRT              | “Small bowel” (loops?)                        | Correlation with volume at each dose level at 5-40 Gy. Strongest correlations for $V_{5Gy}$ - $V_{30Gy}$                                                                                                                                                                       |
| Gunnlaugsson et al (3) | Acute bowel toxicity               | Retrospective                                    | 28        | Rectal cancer, LCRT + oxaliplatin  | 3D-CRT              | Small bowel loops, large bowel, whole abdomen | Only correlation for volume of small bowel irradiated. Correlation with all dose levels 5-50 Gy, strongest for $V_{15Gy}$ .                                                                                                                                                    |
| Kavanagh et al (4)     | Acute & late bowel toxicity        | <b>Review</b> (QUANTEC)                          | NA        | Various pelvic cancers             | Primarily 3D-CRT    | NA                                            | Six studies of small bowel complication identified for review of acute toxicity; one study for late toxicity. Conclusion: Outlining of bowel loops - minimise $V_{15Gy}$ . Outlining peritoneal space - minimise $V_{45Gy}$ . This will also likely reduce late toxicity risk. |
| Robertson et al (5)    | Acute bowel toxicity               | Retrospective                                    | 152       | Rectal cancer, LCRT pre- & post-op | 3D-CRT              | Small bowel loops                             | Absolute $V_{15Gy}$ , $V_{20Gy}$ and $V_{25Gy}$ correlated with acute toxicity; similar findings for pre- and post-operative patients.                                                                                                                                         |
| Chen et al (6)         | Patient-reported acute GI symptoms | Prospective PRO collection, explorative analysis | 66        | Rectal cancer, LCRT                | 3D-CRT              | Small bowel loops                             | Absolute $V_{15Gy}$ correlated with overall patient-reported GI symptoms.                                                                                                                                                                                                      |
| Banerjee et al (7)     | Acute bowel toxicity               | Retrospective                                    | 67        | Rectal cancer, LCRT                | 3D-CRT              | Small bowel loops, peritoneal space           | Absolute $V_{15Gy}$ and $V_{25Gy}$ correlated with acute toxicity for both small bowel loops and peritoneal space.                                                                                                                                                             |

|                       |                                    |               |     |                               |               |                                                           |                                                                                                                                                                                                                                                      |
|-----------------------|------------------------------------|---------------|-----|-------------------------------|---------------|-----------------------------------------------------------|------------------------------------------------------------------------------------------------------------------------------------------------------------------------------------------------------------------------------------------------------|
| Yang et al (8)        | Acute bowel toxicity               | Retrospective | 177 | Rectal cancer, LCRT           | IMRT & 3D-CRT | Bowel loops                                               | Relative $V_{45Gy}$ best predictor for acute toxicity in multivariate modelling.                                                                                                                                                                     |
| Devisetty et al (9)   | Acute bowel toxicity               | Retrospective | 48  | Anal cancer, CRT              | IMRT          | Outer contour of bowel                                    | Absolute $V_{30Gy}$ correlated with clinically significant acute toxicity.                                                                                                                                                                           |
| DeFoe et al (10)      | Acute bowel toxicity               | Retrospective | 58  | Anal cancer, CRT              | IMRT          | Intestinal cavity                                         | Absolute $V_{30Gy}$ and $V_{40Gy}$ correlated with acute toxicity.                                                                                                                                                                                   |
| Han et al (11)        | Acute bowel toxicity               | Prospective   | 42  | Anal cancer, CRT              | IMRT          | Small and large bowel loops                               | Relative $V_{30Gy}$ for small bowel showed moderate correlation with acute toxicity; no correlation for large bowel.                                                                                                                                 |
| Julie et al (12)      | Acute bowel toxicity               | Retrospective | 108 | Anal cancer, CRT              | IMRT          | Bowel loops                                               | Model combining absolute bowel $V_{45Gy}$ and mean dose to hottest 5% of bowel best predictor for acute toxicity.                                                                                                                                    |
| Olsen et al (13)      | Acute & late bowel toxicity        | Prospective   | 52  | Anal cancer, CRT              | IMRT          | Small bowel loops, intestinal cavity                      | Absolute $V_{25Gy}$ - $V_{35Gy}$ for small bowel correlated with acute toxicity (and absolute $V_{5Gy}$ - $V_{25Gy}$ for intestinal cavity with high grade acute toxicity). Absolute $V_{60Gy}$ for intestinal cavity correlated with late toxicity. |
| Ng et al (14)         | Acute bowel toxicity               | Retrospective | 55  | Anal cancer, CRT              | IMRT          | Small and large bowel loops, intestinal cavity            | Absolute volume of intestinal cavity correlated with acute toxicity for all dose levels 5-50 Gy; strongest correlation for $V_{10Gy}$ - $V_{35Gy}$ .                                                                                                 |
| Sanguineti et al (15) | Acute bowel toxicity               | Retrospective | 149 | Prostate cancer               | 3D-CRT & IMRT | Intestinal cavity                                         | Absolute $V_{15Gy}$ and $V_{30Gy}$ cavity correlated with acute toxicity.                                                                                                                                                                            |
| Perna et al (16)      | Acute bowel toxicity               | Retrospective | 96  | Prostate cancer, post-op      | IMRT          | Intestinal cavity outside PTV, bowel loops                | Relative $V_{50Gy}$ for bowel loops correlated with acute toxicity.                                                                                                                                                                                  |
| Sina et al (17)       | Patient-reported acute GI symptoms | Prospective   | 206 | Prostate cancer, some post-op | IMRT          | Small and large bowel loops                               | Best multivariate model for change in loose stools from baseline to RT mid-point included absolute $V_{42Gy}$ for small bowel.                                                                                                                       |
| Chi et al (18)        | Acute bowel toxicity               | Retrospective | 32  | Endometrial cancer, post-op   | IMRT          | Small bowel loops, limited bowel space, intestinal cavity | Relative $V_{45Gy}$ for intestinal cavity correlated with acute toxicity, no correlation for alternative outlining.                                                                                                                                  |
| Isohashi et al (19)   | Acute & late bowel toxicity        | Retrospective | 62  | Cervical cancer, post-op      | 3D-CRT & IMRT | Small bowel loops, bowel bag                              | Higher values of absolute $V_{40Gy}$ and $V_{45Gy}$ for both small bowel and bowel bag for patients with acute toxicity,                                                                                                                             |

|                   |                             |               |     |                          |               |                                                |                                                                                                                                                                                                                                         |
|-------------------|-----------------------------|---------------|-----|--------------------------|---------------|------------------------------------------------|-----------------------------------------------------------------------------------------------------------------------------------------------------------------------------------------------------------------------------------------|
|                   |                             |               |     |                          |               |                                                | higher values of absolute $V_{15Gy}$ - $V_{45Gy}$ for patients with chronic toxicity.                                                                                                                                                   |
| Chopra et al (20) | Acute & late bowel toxicity | Retrospective | 103 | Cervical cancer, post-op | 3D-CRT & IMRT | Small and large bowel loops, intestinal cavity | Absolute $V_{30Gy}$ for intestinal cavity correlated with acute toxicity. Absolute $V_{30Gy}$ - $V_{40Gy}$ for small and large bowel and intestinal cavity correlated with late toxicity in univariate, but not multivariate, analysis. |

Pubmed search string

*(((chemoradiation) OR radiation therapy) OR radiochemotherapy)) AND (((Toxicity intestines) OR ((Gastrointestinal toxicity) OR Gastrointestinal side effects)))) OR Side effects intestines) AND ((dose-response) OR dose-volume)*

Abstracts were screened by hand, and relevant papers selected for full text review, with additional studies identified from reference lists.

## References

1. Baglan KL, Frazier RC, Yan D, *et al.* The dose-volume relationship of acute small bowel toxicity from concurrent 5-FU-based chemotherapy and radiation therapy for rectal cancer. *Int. J. Radiat. Oncol. Biol. Phys.* 2002;52:176–83.
2. Tho LM, Glegg M, Paterson J, *et al.* Acute small bowel toxicity and preoperative chemoradiotherapy for rectal cancer: investigating dose-volume relationships and role for inverse planning. *Int. J. Radiat. Oncol. Biol. Phys.* 2006;66:505–13.
3. Gunnlaugsson A, Kjellén E, Nilsson P, *et al.* Dose-volume relationships between enteritis and irradiated bowel volumes during 5-fluorouracil and oxaliplatin based chemoradiotherapy in locally advanced rectal cancer. *Acta Oncol.* 2007;46:937–44.
4. Kavanagh BD, Pan CC, Dawson LA, *et al.* Radiation dose-volume effects in the stomach and small bowel. *Int. J. Radiat. Oncol. Biol. Phys.* 2010;76:S101-7.
5. Robertson JM, Söhn M, Yan D. Predicting grade 3 acute diarrhea during radiation therapy for rectal cancer using a cutoff-dose logistic regression normal tissue complication probability model. *Int. J. Radiat. Oncol. Biol. Phys.* 2010;77:66–72.
6. Chen RC, Mamon HJ, Ancukiewicz M, *et al.* Dose-volume effects on patient-reported acute gastrointestinal symptoms during chemoradiation therapy for rectal cancer. *Int J Radiat Oncol Biol Phys* 2012;83:e513-7
7. Banerjee R, Chakraborty S, Nygren I, *et al.* Small bowel dose parameters predicting grade  $\geq 3$  acute toxicity in rectal cancer patients treated with neoadjuvant chemoradiation: an independent validation study comparing peritoneal space versus small bowel loop contouring techniques. *Int. J. Radiat. Oncol. Biol. Phys.* 2013;85:1225–31.
8. Yang TJ, Oh JH, Son CH, *et al.* Predictors of acute gastrointestinal toxicity during pelvic chemoradiotherapy in patients with rectal cancer. *Gastrointest. Cancer Res.* 2013;6:129–36.

9. Devisetty K, Mell LK, Salama JK, *et al.* A multi-institutional acute gastrointestinal toxicity analysis of anal cancer patients treated with concurrent intensity-modulated radiation therapy (IMRT) and chemotherapy. *Radiother. Oncol.* 2009;93:298–301.
10. DeFoe SG, Kabolizadeh P, Heron DE, *et al.* Dosimetric parameters predictive of acute gastrointestinal toxicity in patients with anal carcinoma treated with concurrent chemotherapy and intensity-modulated radiation therapy. *Oncology.* 2013;85:1–7.
11. Han K, Cummings BJ, Lindsay P, *et al.* Prospective evaluation of acute toxicity and quality of life after IMRT and concurrent chemotherapy for anal canal and perianal cancer. *Int. J. Radiat. Oncol. Biol. Phys.* 2014;90:587–594.
12. Julie DAR, Oh JH, Apte AP, *et al.* Predictors of acute toxicities during definitive chemoradiation using intensity-modulated radiotherapy for anal squamous cell carcinoma. *Acta Oncol.* 2016;55:208–16.
13. Olsen JR, Moughan J, Myerson R, *et al.* Predictors of Radiation Therapy–Related Gastrointestinal Toxicity From Anal Cancer Dose-Painted Intensity Modulated Radiation Therapy: Secondary Analysis of NRG Oncology RTOG 0529. *Int. J. Radiat. Oncol. Biol. Phys.* 2017;98:400–408.
14. Ng M, Ho H, Skelton J, *et al.* Intensity-modulated Radiotherapy for Anal Cancer: Dose-Volume Relationship of Acute Gastrointestinal Toxicity and Disease Outcomes. *Clin Oncol* 2018;30(10):634-641
15. Sanguineti G, Endres EJ, Sormani MP, *et al.* Dosimetric predictors of diarrhea during radiotherapy for prostate cancer. *Strahlenther. Onkol.* 2009;185:390–6.
16. Perna L, Alongi F, Fiorino C, *et al.* Predictors of acute bowel toxicity in patients treated with IMRT whole pelvis irradiation after prostatectomy. *Radiother. Oncol.* 2010;97:71–5.
17. Sini C, Noris Chiorda B, Gabriele P, *et al.* Patient-reported intestinal toxicity from whole pelvis intensity-modulated radiotherapy: First quantification of bowel dose–volume effects. *Radiother. Oncol.* 2017;124:296–301.
18. Chi A, Nguyen NP, Xu J, *et al.* Correlation of three different approaches of small bowel delineation and acute lower gastrointestinal toxicity in adjuvant pelvic intensity-modulated radiation therapy for endometrial cancer. *Technol. Cancer Res. Treat.* 2012;11:353–359.
19. Isohashi F, Mabuchi S, Yoshioka Y, *et al.* Intensity-modulated radiation therapy versus three-dimensional conformal radiation therapy with concurrent nedaplatin-based chemotherapy after radical hysterectomy for uterine cervical cancer: comparison of outcomes, complications, and dose-volume histogr. *Radiat. Oncol.* 2015;10:180.
20. Chopra S, Krishnatry R, Dora T, *et al.* Predictors of late bowel toxicity using three different methods of contouring in patients undergoing postoperative radiation for cervical cancer. *Br. J. Radiol.* 2015;88.

## Appendix B: Calculation of SCRT optimisation dose levels

All short course radiotherapy (SCRT) optimisation dose levels were based on dose levels from long course radiotherapy (LCRT), recalculated to 5-fraction treatment schedules, using:

$$D_{SCRT} = \frac{n_{SCRT}}{2} \left( \sqrt{\left(\frac{\alpha}{\beta}\right)^2 + 4 \frac{D_{LCRT}}{n_{SCRT}} \left(\frac{D_{LCRT}}{n_{LCRT}} + \frac{\alpha}{\beta}\right)} - \frac{\alpha}{\beta} \right)$$

where  $D_{SCRT} / n_{SCRT}$  and  $D_{LCRT} / n_{LCRT}$  are total dose and number of fractions for the SCRT and LCRT treatment schedules, respectively. This equation follows directly from the linear-quadratic equation for effective dose.

Dose levels were recalculated using  $\alpha/\beta = 10$  Gy (generic value for acute complications) and  $\alpha/\beta = 3$  Gy (generic value for late complications), and with  $n_{SCRT}$  set to 25-30 fractions (to represent the range of LCRT schedules used in clinical practice).

Results can be found in Table B1.

|                            | $\alpha/\beta = 10$ Gy | $\alpha/\beta = 3$ Gy |
|----------------------------|------------------------|-----------------------|
| <b>15 Gy</b>               |                        |                       |
| Originally in 25 fractions | 12.7 Gy                | 10.6 Gy               |
| Originally in 30 fractions | 12.6 Gy                | 10.4 Gy               |
| <b>30 Gy</b>               |                        |                       |
| Originally in 25 fractions | 23.0 Gy                | 18.7 Gy               |
| Originally in 30 fractions | 22.7 Gy                | 18.1 Gy               |
| <b>35 Gy</b>               |                        |                       |
| Originally in 25 fractions | 26.2 Gy                | 21.2 Gy               |
| Originally in 30 fractions | 25.8 Gy                | 20.5 Gy               |

**Table B1:** Recalculation of dose levels from long course (25-30 fractions) to short course (5 fractions) schedules.

## Appendix C: Detailed dose planning results

| Planning results long-course radiotherapy |                       |                       |                       |
|-------------------------------------------|-----------------------|-----------------------|-----------------------|
|                                           | Centre 1              | Centre 2              | Centre 3              |
| CTV                                       |                       |                       |                       |
| V <sub>47.5Gy</sub> [%]                   | 100.0 (100.0 - 100.0) | 100.0 (100.0 - 100.0) | 100.0 (100.0 - 100.0) |
| PTV                                       |                       |                       |                       |
| V <sub>47.5Gy</sub> [%]                   | 99.4 (99.1 - 99.4)    | 99.1 (99.1 - 99.2)    | 99.8 (99.7 - 99.9)    |
| V <sub>45Gy</sub> [%]                     | 100.0 (100.0 - 100.0) | 100.0 (100.0 - 100.0) | 100.0 (100.0 - 100.0) |
| V <sub>52.5Gy</sub> [%]                   | 0.1 (0.1 - 0.3)       | 0.0 (0.0 - 0.0)       | 0.0 (0.0 - 0.0)       |
| D <sub>50%</sub> [Gy]                     | 50.5 (50.4 - 50.5)    | 49.8 (49.7 - 49.9)    | 50.0 (50.0 - 50.0)    |
| Bowel cavity                              |                       |                       |                       |
| V <sub>15Gy</sub> [cm <sup>3</sup> ]      | 169 (162 - 201)       | 137 (123 - 158)       | 144 (121 - 185)       |
| V <sub>20Gy</sub> [cm <sup>3</sup> ]      | 128 (111 - 156)       | 113 (98 - 136)        | 118 (89 - 153)        |
| V <sub>30Gy</sub> [cm <sup>3</sup> ]      | 92 (74 - 111)         | 87 (72 - 109)         | 81 (63 - 108)         |
| V <sub>45Gy</sub> [cm <sup>3</sup> ]      | 62 (47 - 73)          | 58 (45 - 75)          | 53 (41 - 68)          |
| Small bowel loops                         |                       |                       |                       |
| V <sub>15Gy</sub> [cm <sup>3</sup> ]      | 22 (0 - 68)           | 10 (0 - 45)           | 20 (0 - 57)           |
| V <sub>20Gy</sub> [cm <sup>3</sup> ]      | 9 (0 - 47)            | 5 (0 - 37)            | 9 (0 - 45)            |
| V <sub>30Gy</sub> [cm <sup>3</sup> ]      | 1 (0 - 30)            | 1 (0 - 28)            | 1 (0 - 27)            |
| V <sub>45Gy</sub> [cm <sup>3</sup> ]      | 0 (0 - 18)            | 0 (0 - 19)            | 0 (0 - 17)            |
| Bladder                                   |                       |                       |                       |
| V <sub>15Gy</sub> [%]                     | 53.1 (39.4 - 58.4)    | 33.1 (22.7 - 50.6)    | 36.5 (25.3 - 43.1)    |
| V <sub>35Gy</sub> [%]                     | 12.6 (6.4 - 15.3)     | 13.0 (5.5 - 15.8)     | 11.2 (4.5 - 13.6)     |
| V <sub>50Gy</sub> [%]                     | 1.5 (0.5 - 3.5)       | 0.5 (0.1 - 1.4)       | 1.5 (0.8 - 3.0)       |
| Right femoral head                        |                       |                       |                       |
| V <sub>25Gy</sub> [%]                     | 3.0 (0.3 - 7.4)       | 6.2 (5.4 - 9.1)       | 0.0 (0.0 - 0.2)       |
| V <sub>50Gy</sub> [%]                     | 0.0 (0.0 - 0.0)       | 0.0 (0.0 - 0.0)       | 0.0 (0.0 - 0.0)       |
| Left femoral head                         |                       |                       |                       |
| V <sub>25Gy</sub> [%]                     | 2.9 (0.9 - 5.7)       | 7.4 (4.3 - 8.6)       | 0.0 (0.0 - 0.1)       |
| V <sub>50Gy</sub> [%]                     | 0.0 (0.0 - 0.0)       | 0.0 (0.0 - 0.0)       | 0.0 (0.0 - 0.0)       |
| CI1                                       | 0.89 (0.87 - 0.90)    | 0.96 (0.95 - 0.97)    | 0.93 (0.93 - 0.94)    |
| CI2                                       | 3.27 (3.11 - 3.37)    | 4.83 (4.53 - 5.02)    | 3.43 (3.34 - 3.50)    |

**Table C1:** Planning results for long-course radiotherapy (LCRT) divided by centre. All numbers are medians with interquartile ranges (IQR) in brackets. CTV: Clinical target volume. PTV: Planning target volume. CI: Conformity index.

| Planning results short-course radiotherapy |                       |                       |                       |
|--------------------------------------------|-----------------------|-----------------------|-----------------------|
|                                            | Centre 1              | Centre 2              | Centre 3              |
| CTV                                        |                       |                       |                       |
| V <sub>23.75Gy</sub> [%]                   | 100.0 (100.0 - 100.0) | 100.0 (100.0 - 100.0) | 100.0 (100.0 - 100.0) |
| PTV                                        |                       |                       |                       |
| V <sub>23.75Gy</sub> [%]                   | 99.4 (99.3 - 99.5)    | 99.1 (99.0 - 99.1)    | 99.8 (99.5 - 99.8)    |
| V <sub>22.5Gy</sub> [%]                    | 100.0 (99.9 - 100.0)  | 100.0 (100.0 - 100.0) | 100.0 (100.0 - 100.0) |
| V <sub>26.25Gy</sub> [%]                   | 0.2 (0.1 - 0.3)       | 0.0 (0.0 - 0.0)       | 0.7 (0.4 - 0.8)       |
| D <sub>50</sub> [Gy]                       | 25.3 (25.2 - 25.3)    | 24.9 (24.9 - 24.9)    | 25.0 (25.0 - 25.0)    |
| Bowel cavity                               |                       |                       |                       |
| V <sub>10Gy</sub> [cm <sup>3</sup> ]       | 135 (128 - 168)       | 114 (102 - 142)       | 110 (92 - 155)        |
| V <sub>12.5Gy</sub> [cm <sup>3</sup> ]     | 109 (96 - 138)        | 98 (84 - 125)         | 91 (75 - 126)         |
| V <sub>18Gy</sub> [cm <sup>3</sup> ]       | 79 (65 - 101)         | 76 (63 - 99)          | 67 (53 - 88)          |
| V <sub>23Gy</sub> [cm <sup>3</sup> ]       | 59 (46 - 74)          | 55 (43 - 70)          | 51 (38 - 64)          |
| Small bowel loops                          |                       |                       |                       |
| V <sub>10Gy</sub> [cm <sup>3</sup> ]       | 15 (0 - 51)           | 7 (0 - 39)            | 9 (0 - 40)            |
| V <sub>12.5Gy</sub> [cm <sup>3</sup> ]     | 6 (0 - 38)            | 3 (0 - 32)            | 4 (0 - 32)            |
| V <sub>18Gy</sub> [cm <sup>3</sup> ]       | 0 (0 - 25)            | 0 (0 - 24)            | 0 (0 - 22)            |
| V <sub>23Gy</sub> [cm <sup>3</sup> ]       | 0 (0 - 17)            | 0 (0 - 17)            | 0 (0 - 16)            |
| Bladder                                    |                       |                       |                       |
| V <sub>12.5Gy</sub> [%]                    | 24.7 (14.3 - 33.1)    | 20.9 (9.4 - 28.9)     | 21.9 (9.7 - 25.5)     |
| V <sub>21Gy</sub> [%]                      | 8.4 (3.9 - 10.6)      | 8.2 (3.6 - 9.8)       | 7.2 (3.1 - 8.1)       |
| V <sub>25Gy</sub> [%]                      | 1.6 (0.6 - 3.0)       | 0.9 (0.3 - 1.8)       | 1.6 (0.6 - 2.8)       |
| Right femoral head                         |                       |                       |                       |
| V <sub>12.5Gy</sub> [%]                    | 3.9 (0.7 - 7.9)       | 7.2 (3.1 - 8.8)       | 0.0 (0.0 - 0.0)       |
| V <sub>25Gy</sub> [%]                      | 0.0 (0.0 - 0.0)       | 0.0 (0.0 - 0.0)       | 0.0 (0.0 - 0.0)       |
| Left femoral head                          |                       |                       |                       |
| V <sub>12.5Gy</sub> [%]                    | 2.2 (1.1 - 3.9)       | 5.6 (4.4 - 8.2)       | 0.0 (0.0 - 0.0)       |
| V <sub>25Gy</sub> [%]                      | 0.0 (0.0 - 0.0)       | 0.0 (0.0 - 0.0)       | 0.0 (0.0 - 0.0)       |
| CI1                                        | 0.87 (0.86 - 0.89)    | 0.95 (0.95 - 0.96)    | 0.94 (0.93 - 0.95)    |
| CI2                                        | 3.31 (3.20 - 3.45)    | 4.57 (4.45 - 5.17)    | 3.48 (3.44 - 3.56)    |

**Table 2:** Planning results for short-course radiotherapy (SCRT) divided by centre. All numbers are medians with interquartile ranges (IQR) in brackets. CTV: Clinical target volume. PTV: Planning target volume. CI: Conformity index.
